# Supplementary material for: Idiopathic Plasmacytic Lymphadenopathy Forms an Independent Subtype of Idiopathic Multicentric Castleman Disease
Source: MDPI journal article supplement (doi:10.3390/ijms231810301), 2022-09-07
Supplement: s1 [file s1]

**Supplementary Table S1.** Sites of lymphadenopathy and biopsy sites in iMCD-NOS cases.

| Subtype | Age/Sex | Biopsy site                 | Site of lymphadenopathy                                                                  | Extranodal lesion                         |
|---------|---------|-----------------------------|------------------------------------------------------------------------------------------|-------------------------------------------|
| IPL     | 47/M    | inguinal                    | mediastinum, hilar, inguinal                                                             | multiple lung nodules                     |
|         | 35/F    | cervical                    | cervical, supraclavicular fossa, axillary, para-aortic, mesenterium, inguinal            |                                           |
|         | 55/M    | inguinal                    | mediastinum, inguinal                                                                    | multiple lung nodules                     |
|         | 62/M    | -*                          | systemic, unspecified *                                                                  | multiple lung nodules, kidney             |
|         | 55/F    | inguinal                    | systemic, unspecified *                                                                  | skin                                      |
|         | 76/M    | cervical                    | cervical, axillary, inguinal                                                             |                                           |
|         | 61/F    | axillary                    | systemic, unspecified *                                                                  |                                           |
|         | 37/M    | -*                          | cervical, axillary, abdominal                                                            | multiple lung nodules                     |
|         | 39/M    | inguinal                    | systemic, unspecified *                                                                  |                                           |
|         | 49/F    | mediastinum                 | infraclavicular, mediastinum, axillary, inguinal                                         | multiple lung nodules                     |
|         | 48/F    | axillary                    | axillary                                                                                 |                                           |
|         | 59/M    | cervical                    | cervical, axillary, abdominal, inguinal                                                  | multiple lung nodules, skin               |
|         | 64/M    | inguinal                    | cervical, axillary, mesenterium, pelvis, inguinal                                        | multiple lung nodules                     |
|         | 70/M    | cervical                    | cervical, supraclavicular fossa, mediastinum, axillary, para-aortic                      |                                           |
|         | 54/F    | cervical                    | cervical, axillary                                                                       |                                           |
|         | 65/M    | cervical                    | systemic, unspecified *                                                                  | tonsil swelling                           |
|         | 62/F    | cervical                    | cervical (bilateral, multiple)                                                           |                                           |
|         | 37/M    | inguinal                    | axillary, inguinal                                                                       | splenomegaly                              |
|         | 55/F    | -*                          | cervical, supraclavicular fossa, mediastinum, axillary, para-aortic, abdominal, inguinal | multiple lung nodules                     |
|         | 52/F    | axillary                    | mediastinum, hilar, axillary                                                             |                                           |
|         | 74/F    | mediastinum                 | mediastinum, abdominal                                                                   |                                           |
|         | 34/M    | mediastinum                 | cervical, mediastinum, hilar                                                             | hepatosplenomegaly                        |
|         | 57/M    | inguinal                    | cervical, axillary, para-aortic, iliac, inguinal                                         |                                           |
|         | 59/M    | cervical                    | cervical, axillary                                                                       |                                           |
|         | 52/F    | inguinal                    | cervical, para-aortic, inguinal                                                          | skin                                      |
|         | 70/M    | cervical                    | cervical, mediastinum, para-aortic,                                                      |                                           |
|         | 43/M    | inguinal                    | supraclavicular fossa, inguinal                                                          |                                           |
|         | 41/M    | cervical                    | cervical, supraclavicular, axillary, inguinal,                                           | hepatosplenomegaly, kidney                |
|         | 49/M    | axillary                    | cervical, supraclavicular, mediastinum, axillary, inguinal                               |                                           |
|         | 48/F    | axillary                    | axillary, para-aortic, abdominal                                                         | hepatosplenomegaly                        |
|         | 38/F    | inguinal                    | cervical, mediastinum, inguinal                                                          | multiple lung nodules, splenomegaly, skin |
|         | 76/M    | cervical                    | cervical, subclavicular, axillary, para-aortic, pelvis, inguinal                         | multiple lung nodules                     |
|         | 67/M    | inguinal                    | axillary, inguinal                                                                       |                                           |
|         | 72/M    | cervical                    | cervical (bilateral, multiple)                                                           |                                           |
| non-IPL | 70/M    | supraclavicular fossa       | supraclavicular, mediastinum                                                             | kidney                                    |
|         | 52/F    | axillary                    | cervical, axillary, inguinal                                                             |                                           |
|         | 89/M    | para-aortic (needle biopsy) | mediastinum, retroperitoneum (multiple)                                                  |                                           |
|         | 73/F    | axillary                    | mediastinum, axillary                                                                    | multiple lung nodules, skin               |
|         | 49/F    | axillary                    | systemic, unspecified *                                                                  |                                           |
|         | 32/M    | cervical                    | systemic, unspecified *                                                                  | hepatosplenomegaly                        |
|         | 49/F    | cervical                    | systemic, unspecified *                                                                  | kidney, skin                              |
|         | 49/F    | cervical                    | systemic, unspecified *                                                                  | kidney                                    |

Multiple lymphadenopathies were noted in all cases. Sampling site was unknown in 3 cases of IPL group. All cases had excisional biopsy except for one non-IPL case who had a core needle biopsy. \* Details unknown.
